# Supplementary material for: Catalytic exchange of hydrogen isotopes intensified by two-phase stratified flow in wettability designable microchannels
Source: Royal Society of Chemistry journal article supplement (doi:10.1039/d0lc00250j), 2020-01-01
Supplement: d0lc00250j1.pdf [file d0lc00250j1.pdf]

**Supplementary information for**

**Catalytic exchange of hydrogen isotopes intensified by two-phase stratified flow in wettability designable microchannels**

Yuexiao Song, Feng Xin\* and Yongsheng Xu

School of Chemical Engineering and Technology, Tianjin University, Tianjin 300350, China

\*Corresponding Author: xinf@tju.edu.cn (F. Xin)

## S1. Preparation of Pt/AC/PDMS coating on the walls of the microchannel reactor

The Pt/AC/PDMS coatings were prepared on the channel walls according to a “glue + powder” approach described by Li et al.<sup>[S1]</sup> using the commercial PDMS (Sylgard 184) as the “glue” and the Pt/AC catalyst as the “powder”. The diluted PDMS solution (10% w/v in *n*-hexane) was prepared by dissolving PDMS base and curing agent (a 10:1 w/w ratio) in *n*-hexane. The Pt/AC catalyst was ground and then sieved by a 200-mesh sieve prior to preparing the coatings. The procedure is specified as follows:

- (1) The channel substrate was sealed with a silicone sheet.
- (2) The diluted PDMS solution was injected into the microchannel.
- (3) A thin liquid film would be deposited on the channel walls while the excess solution was withdrawn.
- (4) The silicone sheet was opened to let hexane evaporate.
- (5) After the most of hexane was evaporated, the uncured adhesive surface was covered by the Pt/AC powder for 5 minute.
- (6) After removing the excess powder, the prepared coating was cured under 80 °C for 2 hours. The top surface of the channel substrate was cleaned so that the channel substrate could bond with the cover plate successfully.

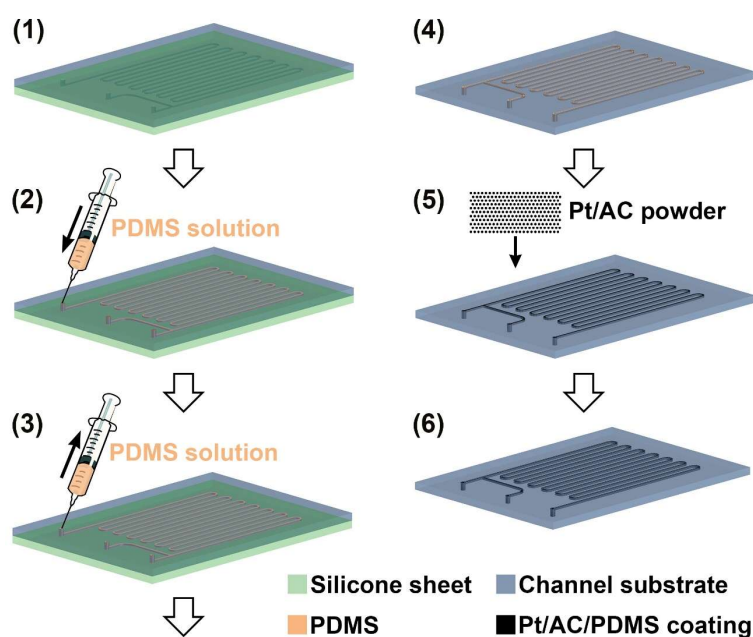

**Fig. S1.** Schematic of the process for preparing Pt/AC/PDMS coating on the walls of the microchannel reactor.

## S2. Calculation of the $y_{\text{HD1}}^*$

Rolston et al.<sup>[S2]</sup> measured the overall deuterium (D) isotope separation factor between hydrogen and liquid water,  $\alpha$ , at 280–370 K. The  $\alpha$  is defined as eqn (S1). The correlation between  $\alpha$  and temperature ( $T$ , K) is presented as eqn (S2). Based on the mass balance of D, the D abundance in the liquid water at outlet of the microchannel reactor ( $x_{\text{D1}}$ ) is calculated by eqn (S3). The equilibrium D abundance in hydrogen at the outlet ( $y_{\text{D1}}^*$ ) can be calculated by eqn (S4) transformed from eqn (S1). The equilibrium molar fraction of HD in hydrogen at the outlet ( $y_{\text{HD1}}^*$ ) is twice the  $y_{\text{D1}}^*$  calculated as eqn (S5).

$$\alpha = \frac{x_{\text{D}}^*(1 - y_{\text{D}}^*)}{y_{\text{D}}^*(1 - x_{\text{D}}^*)} \quad (\text{S1})$$

$$\ln \alpha = -0.2143 + \frac{368.9}{T} + \frac{27870}{T^2} \quad (\text{S2})^{[\text{S2}]}$$

$$x_{\text{D1}} = \frac{2x_{\text{D0}}F_{\text{H}_2\text{O}} - (y_{\text{HD1}} - y_{\text{HD0}})F_{\text{H}_2}}{2F_{\text{H}_2\text{O}}} \quad (\text{S3})$$

$$y_{\text{D1}}^* = \frac{1}{1 - \alpha + \alpha / x_{\text{D1}}} \quad (\text{S4})$$

$$y_{\text{HD1}}^* = 2y_{\text{D1}}^* \quad (\text{S5})$$

where  $x_{\text{D}}^*$  and  $y_{\text{D}}^*$  are the equilibrium D abundances in liquid water and hydrogen, respectively;  $x_{\text{D0}}$  is the D abundance in liquid water at inlet of the microchannel reactor;  $F_{\text{H}_2\text{O}}$  and  $F_{\text{H}_2}$  are the feeding molar flow rates of water and hydrogen, respectively;  $y_{\text{HD0}}$  and  $y_{\text{HD1}}$  are the molar fractions of HD in hydrogen at inlet and outlet of the microchannel reactor, respectively.

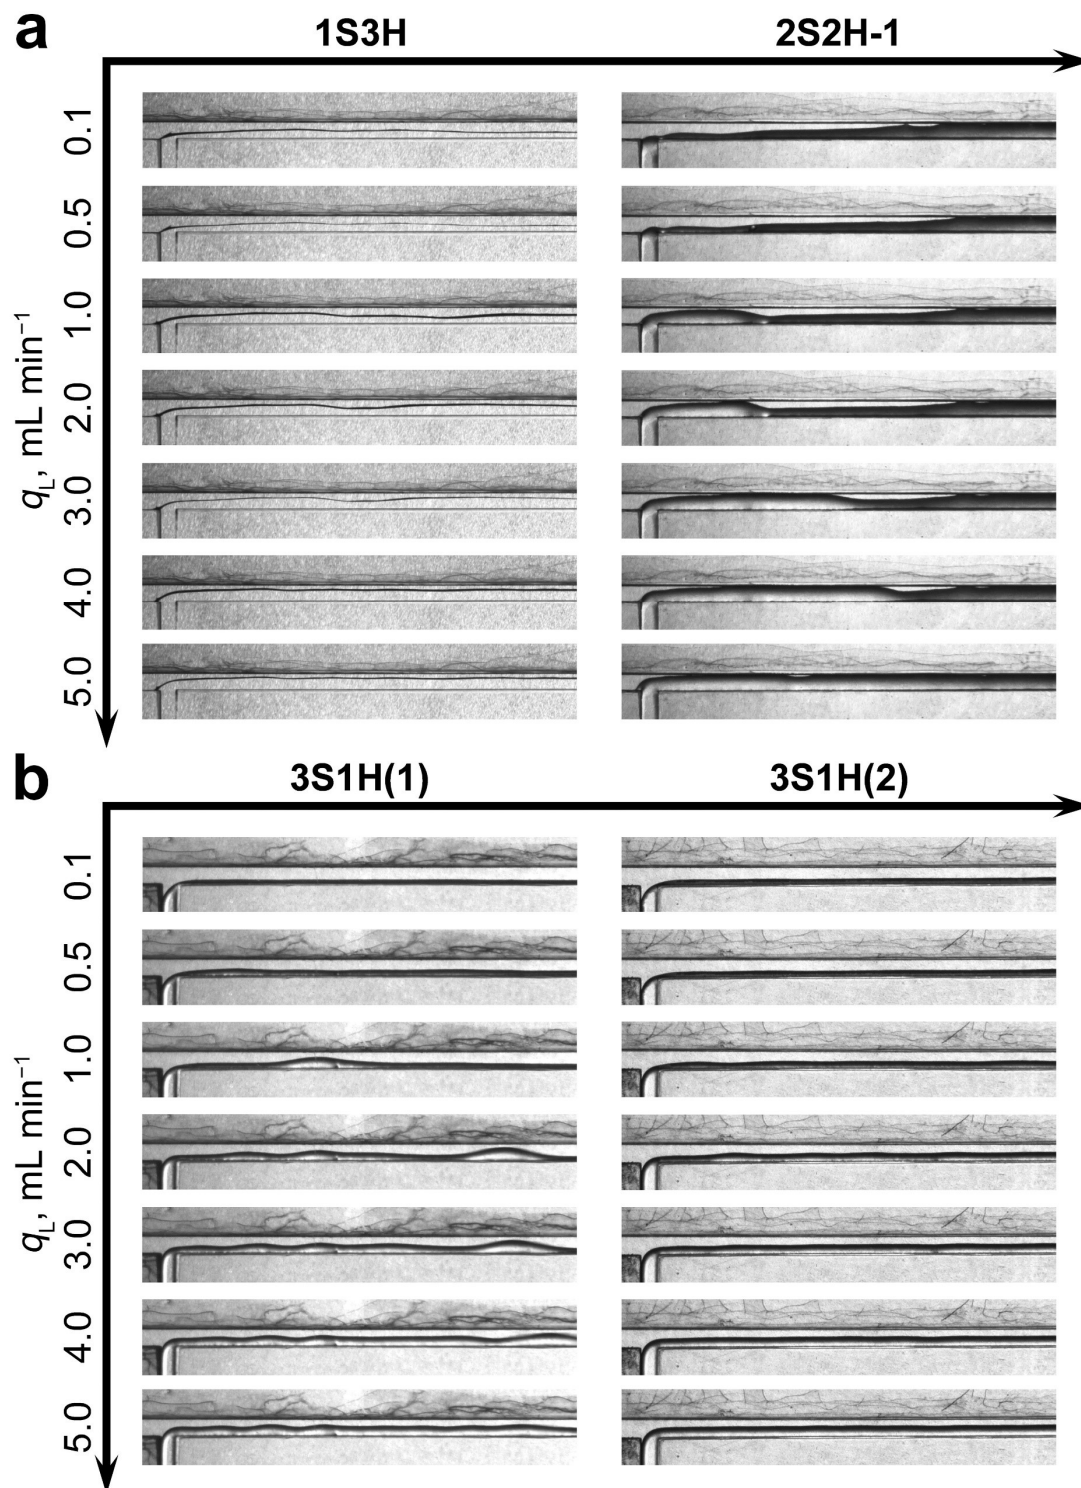

**Fig. S2.** Effects of liquid flow rate ( $q_L$ ) on flow patterns at a given gas flow rate ( $q_G = 15.0 \text{ mL min}^{-1}$ ) in the 1S3H, 2S2H-1, 3S1H(1) and 3S1H(2) microchannels.

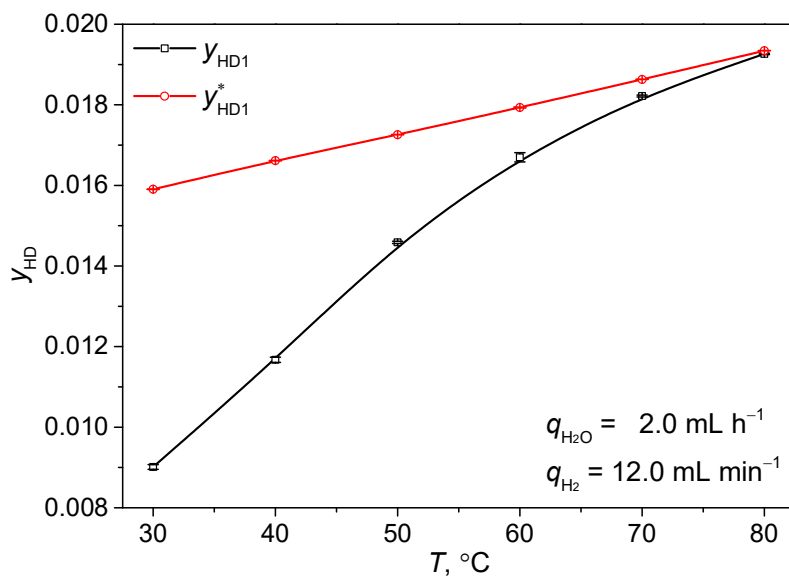

**Fig. S3.** Effects of temperature ( $T$ ) on molar fraction ( $y_{HD1}$ ) and equilibrium molar fraction ( $y_{HD1}^*$ ) of HD in hydrogen at outlet of the microchannel reactor at  $x_{D0} = 0.03$ ,  $q_{H_2O} = 2.0 \text{ mL h}^{-1}$  and  $q_{H_2} = 12.0 \text{ mL min}^{-1}$ .

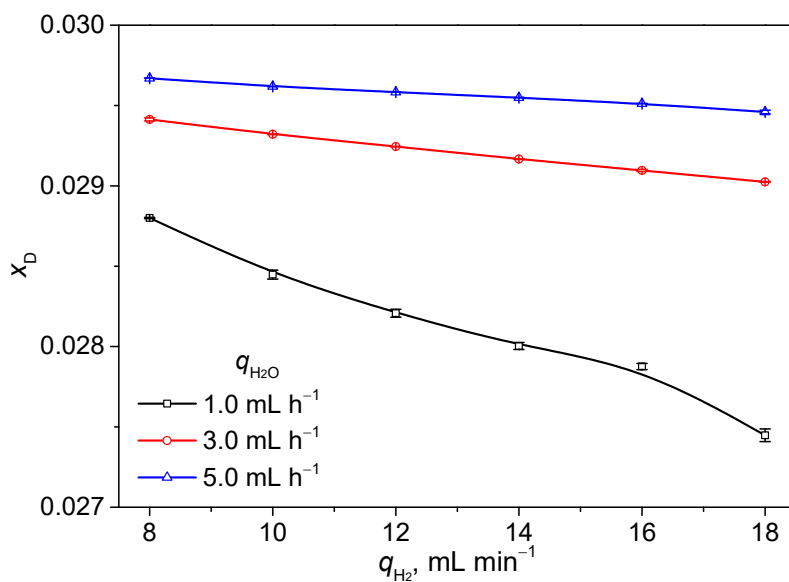

**Fig. S4.** Effects of hydrogen ( $q_{H_2}$ ) and water ( $q_{H_2O}$ ) flow rates on average D abundance in the water flow ( $x_D = (x_{D0} + x_{D1})/2$ ) of the microchannel reactor at  $x_{D0} = 0.03$  and  $T = 60 \text{ }^\circ\text{C}$ .

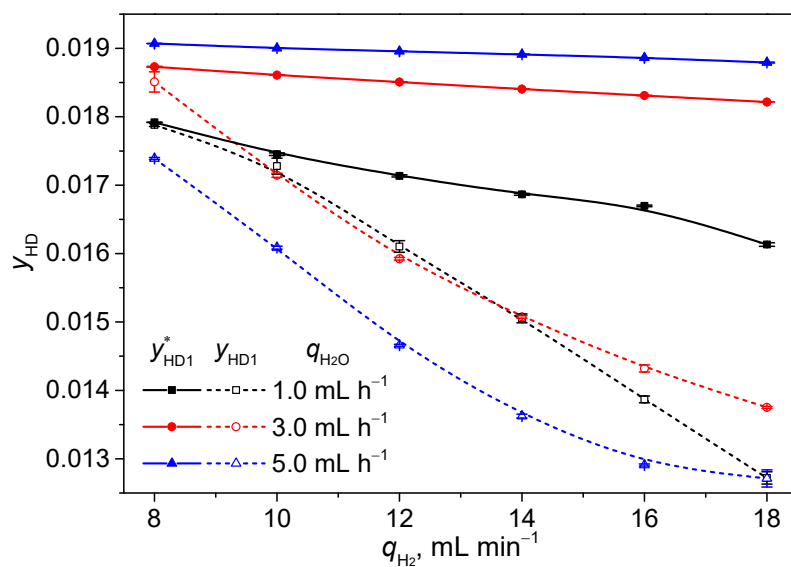

**Fig. S5.** Effects of hydrogen ( $q_{H_2}$ ) and water ( $q_{H_2O}$ ) flow rates on molar fraction ( $y_{HD1}$ ) and equilibrium molar fraction ( $y_{HD1}^*$ ) of HD in hydrogen at outlet of the microchannel reactor at  $x_{D0} = 0.03$  and  $T = 60$  °C.

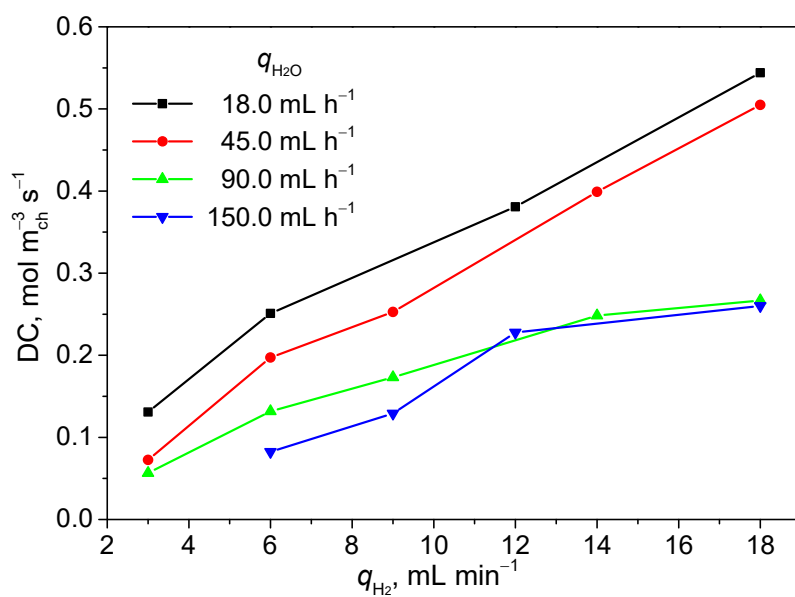

**Fig. S6.** Effects of hydrogen ( $q_{H_2}$ ) and water ( $q_{H_2O}$ ) flow rates on deuterium removal capacity (DC) in the microchannel reactor at  $x_{D0} = 0.03$  and  $T = 60$  °C.

## References

- [S1] Z. Li, M. Cao, P. Li, Y. Zhao, H. Bai, Y. Wu and L. Jiang, *Matter*, 2019, **1**, 661–673.  
[S2] J. H. Rolston, J. Den Hartog and J. P. Butler, *J. Phys. Chem.*, 1976, **80**, 1064–1067.
